# Supplementary material for: Surveillance for Metastasis in High-Risk Uveal Melanoma Patients: Standard versus Enhanced Protocols
Source: MDPI journal article supplement (doi:10.3390/cancers15205025), 2023-10-17
Supplement: s1 [file s1]

Supplemental Table. Metastasis risk modifiers by surveillance protocols

| Feature              | Standard Protocol vs Enhanced Protocol      |                                            |                      | Standard Protocol vs High Frequency         |                                          |                      | Standard Protocol vs Enhanced Modality      |                                             |                      |
|----------------------|---------------------------------------------|--------------------------------------------|----------------------|---------------------------------------------|------------------------------------------|----------------------|---------------------------------------------|---------------------------------------------|----------------------|
|                      | Standard Protocol<br>(n = 11 <sup>1</sup> ) | Enhanced Protocol<br>(n= 76 <sup>1</sup> ) | p-value <sup>2</sup> | Standard Protocol<br>(n = 11 <sup>1</sup> ) | High Frequency<br>(n = 54 <sup>1</sup> ) | p-value <sup>2</sup> | Standard Protocol<br>(n = 11 <sup>1</sup> ) | Enhanced Modality<br>(n = 64 <sup>1</sup> ) | p-value <sup>2</sup> |
| Age (years)          | 57 (50, 70)                                 | 63 (58, 70)                                | 0.2                  | 57 (50, 70)                                 | 63 (58, 69)                              | 0.3                  | 57 (50, 70)                                 | 64 (58, 70)                                 | 0.3                  |
| Sex (Male/Female)    | 7/4                                         | 37/39                                      | 0.4                  | 7/4                                         | 27/27                                    | 0.4                  | 7/4                                         | 30/34                                       | 0.3                  |
| Tumor location       |                                             |                                            | 0.3                  |                                             |                                          | 0.2                  |                                             |                                             | 0.3                  |
| Choroid only         | 10 (91%)                                    | 53 (70%)                                   |                      | 10 (91%)                                    | 35 (65%)                                 |                      | 10 (91%)                                    | 45 (70%)                                    |                      |
| CBD +/- choroid      | 1 (9.1%)                                    | 23 (30%)                                   |                      | 1 (9.1%)                                    | 19 (35%)                                 |                      | 1 (9.1%)                                    | 19 (30%)                                    |                      |
| LBD (mm)             | 13.0 (11.0, 15.8)                           | 15.0 (11.0, 16.5)                          | 0.6                  | 13.0 (11.0, 15.8)                           | 15.3 (11.3, 16.9)                        | 0.5                  | 13.0 (11.0, 15.8)                           | 15.0 (11.0, 16.5)                           | 0.6                  |
| Tumor thickness (mm) | 6.7 (2.6, 10.0)                             | 6.1 (3.8, 9.0)                             | 0.9                  | 6.70 (2.60, 9.95)                           | 6.25 (4.00, 9.00)                        | 0.9                  | 6.7 (2.6, 10.0)                             | 6.3 (3.7, 9.0)                              | 0.9                  |
| PRAME status (+)     | 3 (60%)                                     | 21 (48%)                                   | 0.7                  | 3 (60%)                                     | 19 (56%)                                 | >0.9                 | 3 (60%)                                     | 20 (50%)                                    | >0.9                 |

<sup>1</sup>Median (IQR); n (%)

<sup>2</sup>Wilcoxon rank sum test; Pearson's Chi-squared test; Fisher's exact test

CBD: Ciliary body; LBD: Largest basal diameter
