# Supplementary figures and images for: Surveillance for Metastasis in High-Risk Uveal Melanoma Patients: Standard versus Enhanced Protocols
Source: MDPI journal article supplement (doi:10.3390/cancers15205025), 2023-10-17

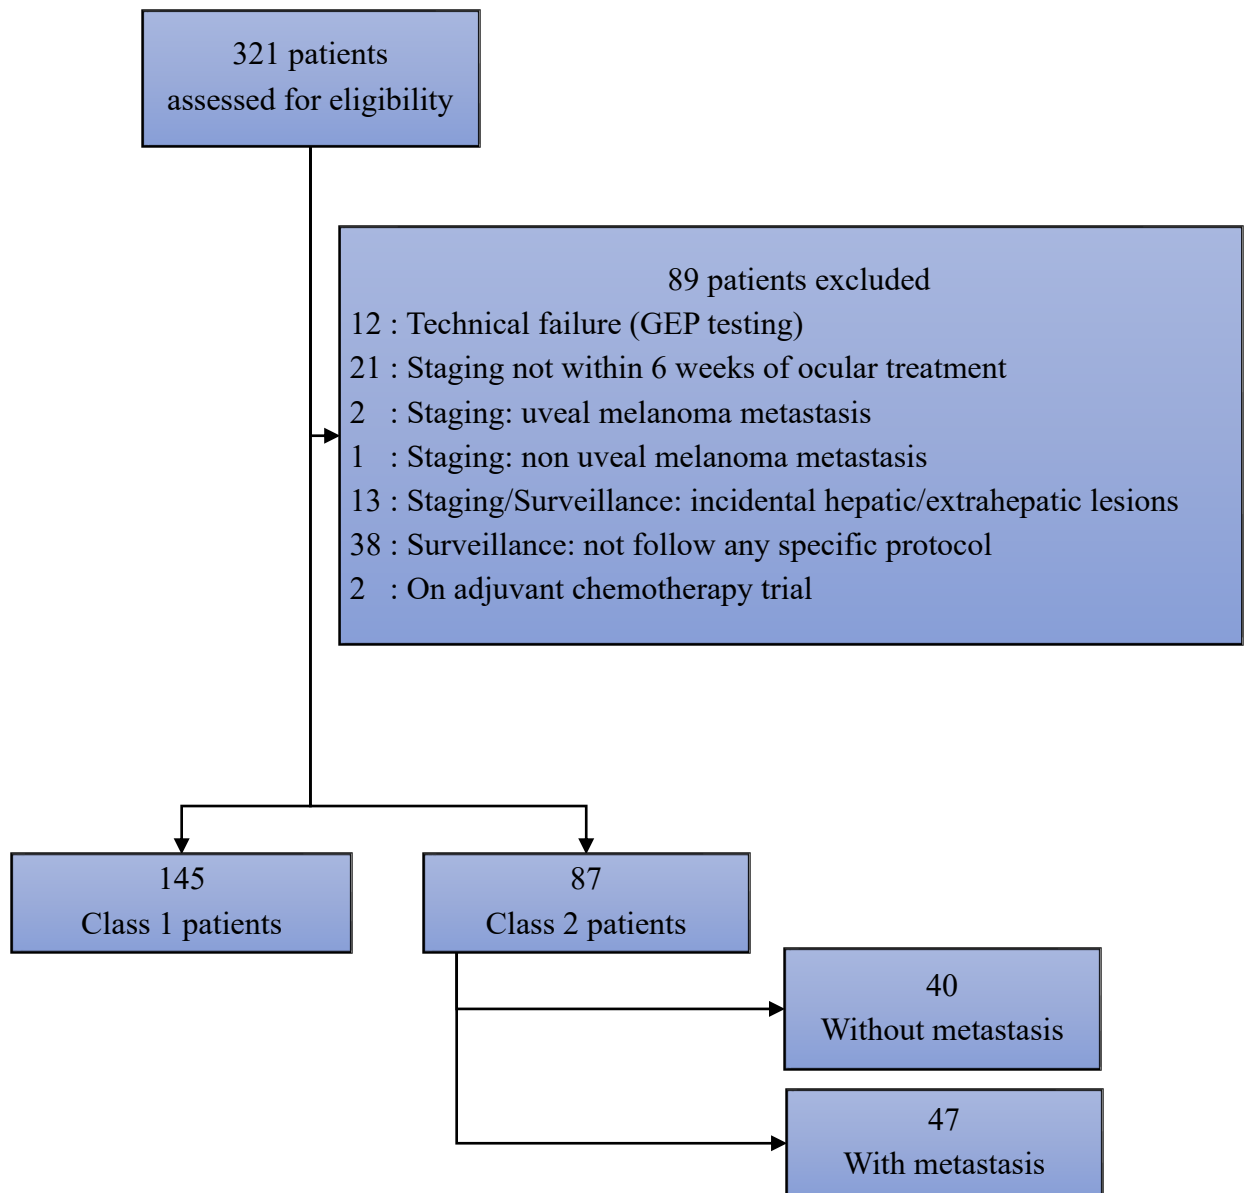

GEP: Gene expression profiling

Supplement: s1 [file s1]
